# Supplementary material for: Facile one-pot preparation of α-SnWO4/reduced graphene oxide (RGO) nanocomposite with improved visible light photocatalytic activity and anode performance for Li-ion batteries
Source: Royal Society of Chemistry journal article supplement (doi:10.1039/c2ra22054g), 2012-11-16

### Supporting Information

**Fig. S1** The molecule structure of methyl orange (MO)

**Fig. S2** Thermogravimetric analysis of the as-prepared  $\alpha$ -SnWO<sub>4</sub>/RGO nanocomposite

**Fig. S3** N<sub>2</sub>-sorption isotherm of  $\alpha$ -SnWO<sub>4</sub>/RGO nanocomposite. (inset: BJH pore size distribution)

**Fig. S4** Temporal absorption spectral patterns of MO during the photodegradation process over (a)  $\alpha$ -SnWO<sub>4</sub> and (b)  $\alpha$ -SnWO<sub>4</sub>/RGO

**Fig. S5** Temporal change of MO concentration as monitored by the UV-vis absorption spectra at 464 nm over (a)  $\alpha$ -SnWO<sub>4</sub>/RGO in darkness, (b)  $\alpha$ -SnWO<sub>4</sub> and (c)  $\alpha$ -SnWO<sub>4</sub>/RGO under visible light irradiations ( $\lambda \geq 420$  nm)

**Fig. S1**

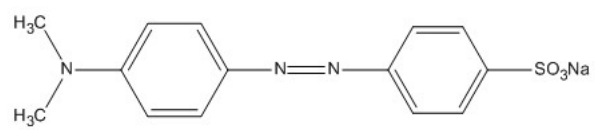

**Fig. S2**

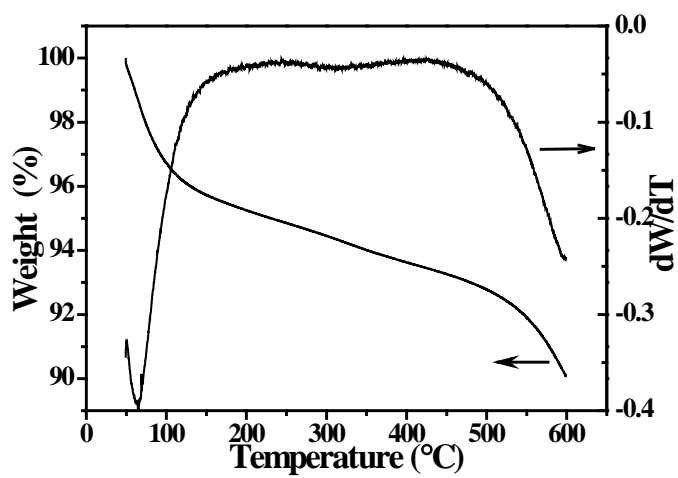

Fig. S3

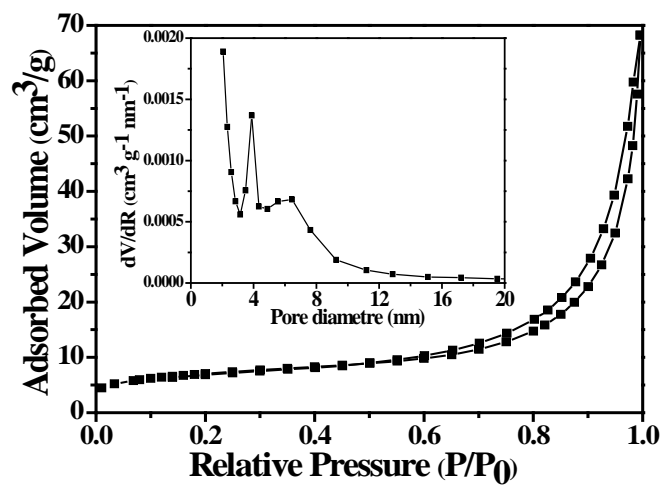

Fig. S4

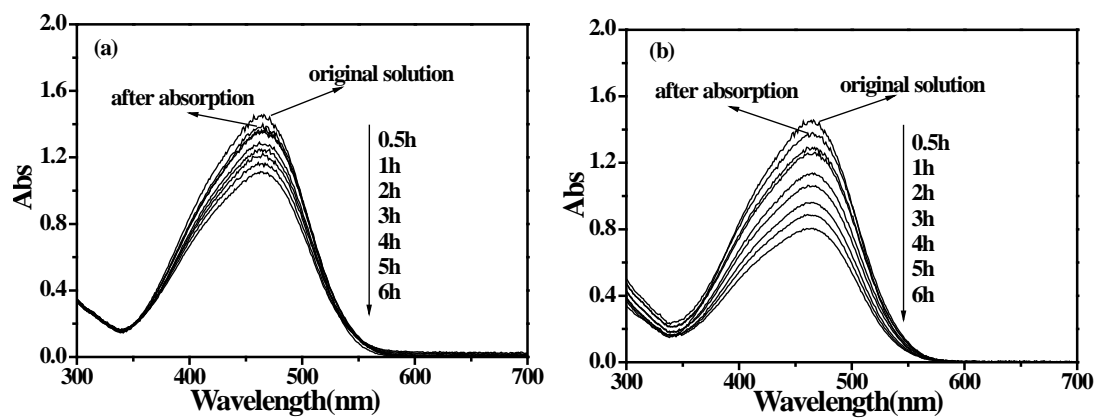

Fig. S5

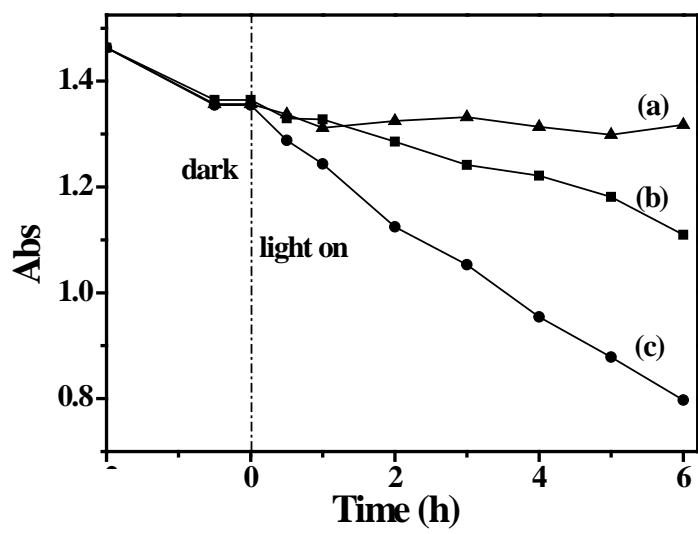

Supplement: c2ra22054g.pdf [file c2ra22054g.pdf]
